# Supplementary material for: Enhancement of Fungal Enzyme Production by Radio-Frequency Electromagnetic Fields
Source: MDPI journal article supplement (doi:10.3390/jof8111187), 2022-11-10
Supplement: s1 [file s1]

## Supplementary Information

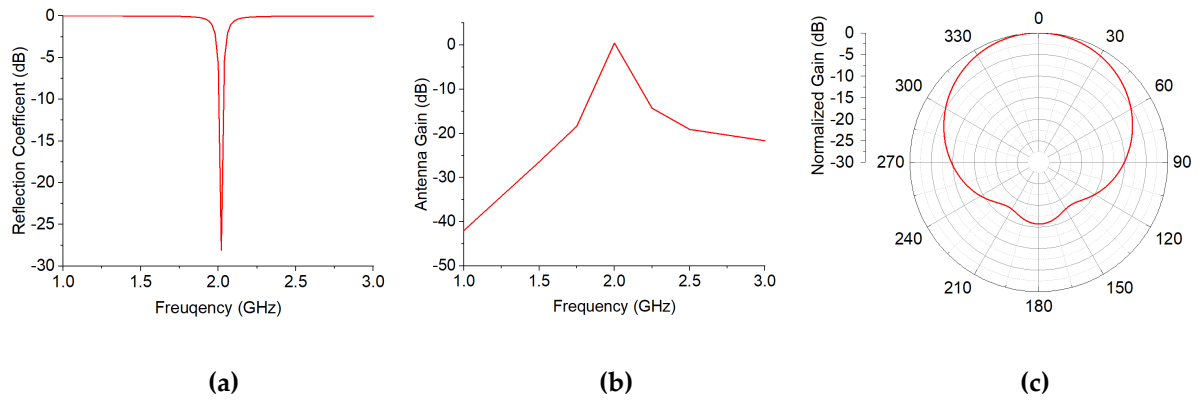

**Supplementary Figure S1.** Reflection coefficient (a), peak gain (b), and normalized radiation pattern (c) of proposed microstrip patch antenna.

(a)

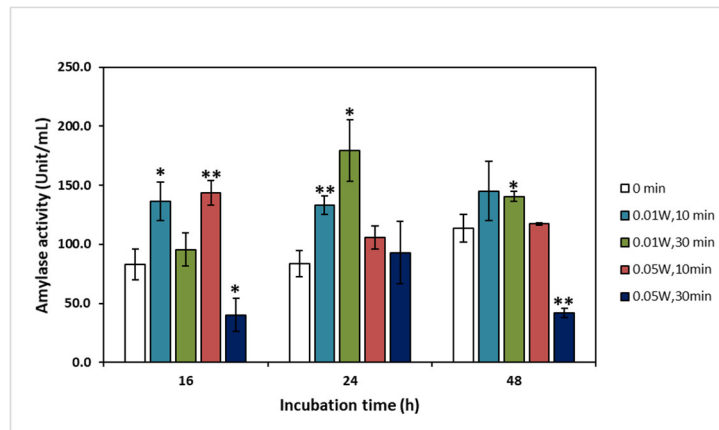

(b)

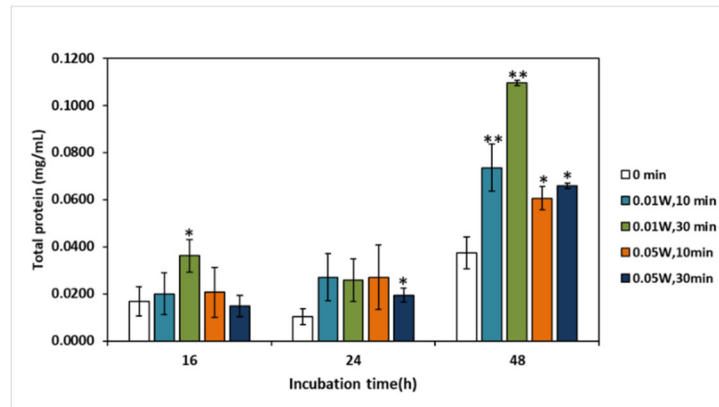

(c)

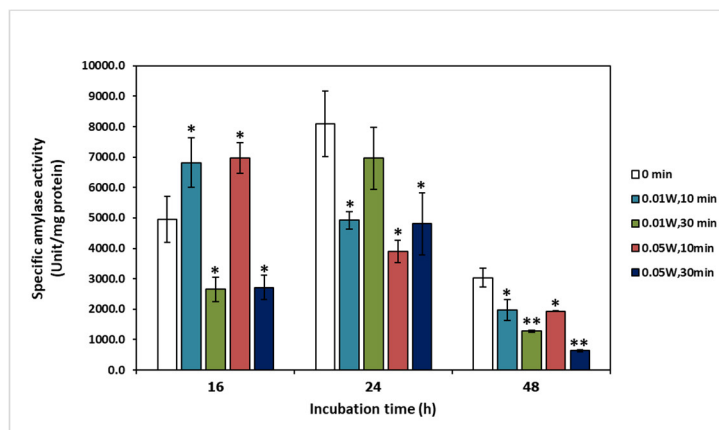

**Supplementary Figure S2.** Activity of  $\alpha$ -amylase (a), amount of total protein (b), and specific activity of  $\alpha$ -amylase (c) in media measured after RF-EMF (radio-frequency electromagnetic fields) exposure. Fungal spore suspension was exposed to RF-EMF (2 GHz, 0.01 or 0.05 W) for 0, 10 or 30 min. Each value represents the mean of 3 replicate measurements: \* $p < 0.05$  and \*\* $p < 0.01$ .

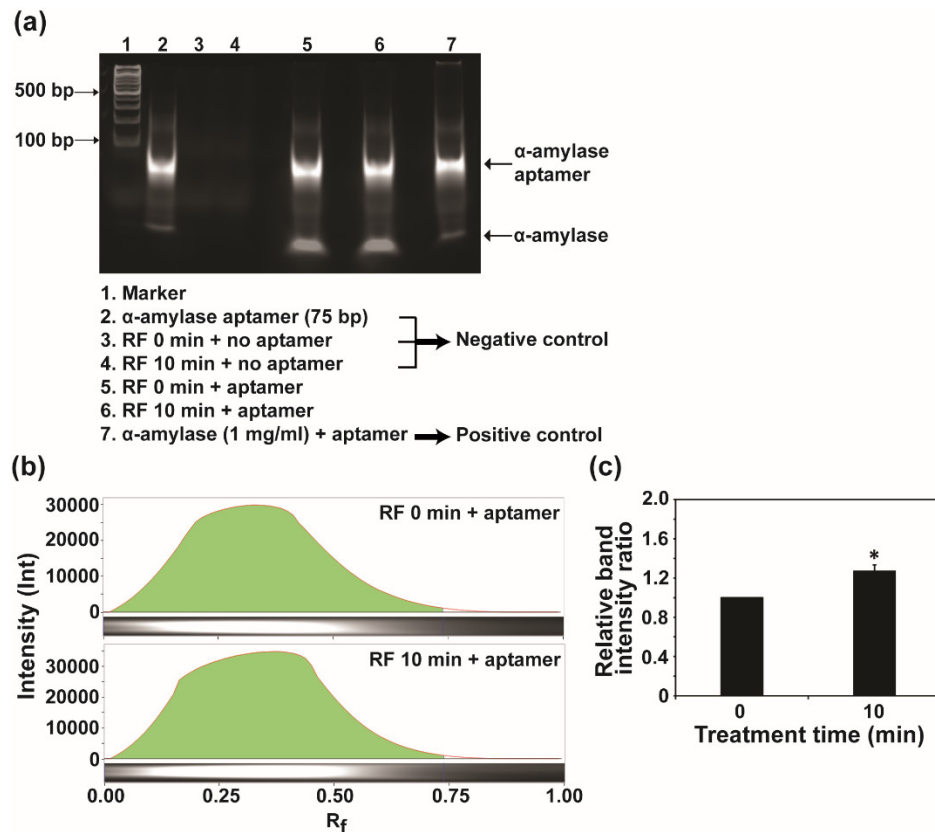

**Supplementary Figure S3.** Level of  $\alpha$ -amylase protein in media analyzed using *A. oryzae*  $\alpha$ -amylase specific aptamer 16 h after fungal spores in PDB were unexposed (control) and exposed to RF-EMF (2 GHz, 0.01 W) for 10 min: (a)  $\alpha$ -amylase detected by specific aptamer on native polyacrylamide gel; (b) Intensity of  $\alpha$ -amylase band estimated using Image Lab Touch Software version 3.0.1 (BioRad); (c) Ratio of  $\alpha$ -amylase level between control and RF exposed samples.

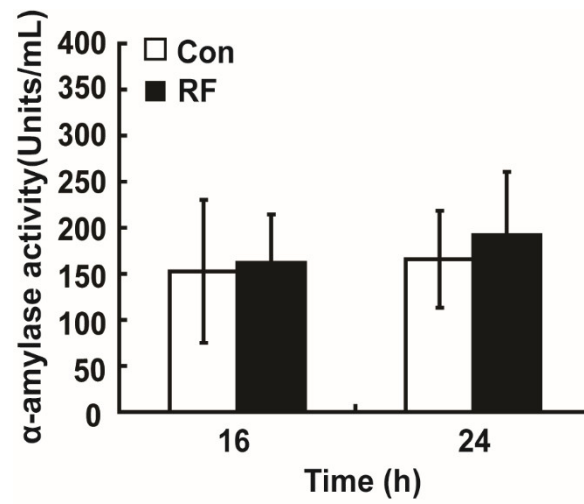

**Supplementary Figure S4.** Effect of RF-EMF on  $\alpha$ -amylase dissolved in PDB medium (2 U/mL; 0.013 mg/mL). RF-EMF (2 GHz, 0.01 W) was applied to  $\alpha$ -amylase solution for 10 min, and then samples were incubated for 16 and 24 h. Each value represents the mean of 4 replicate measurements.

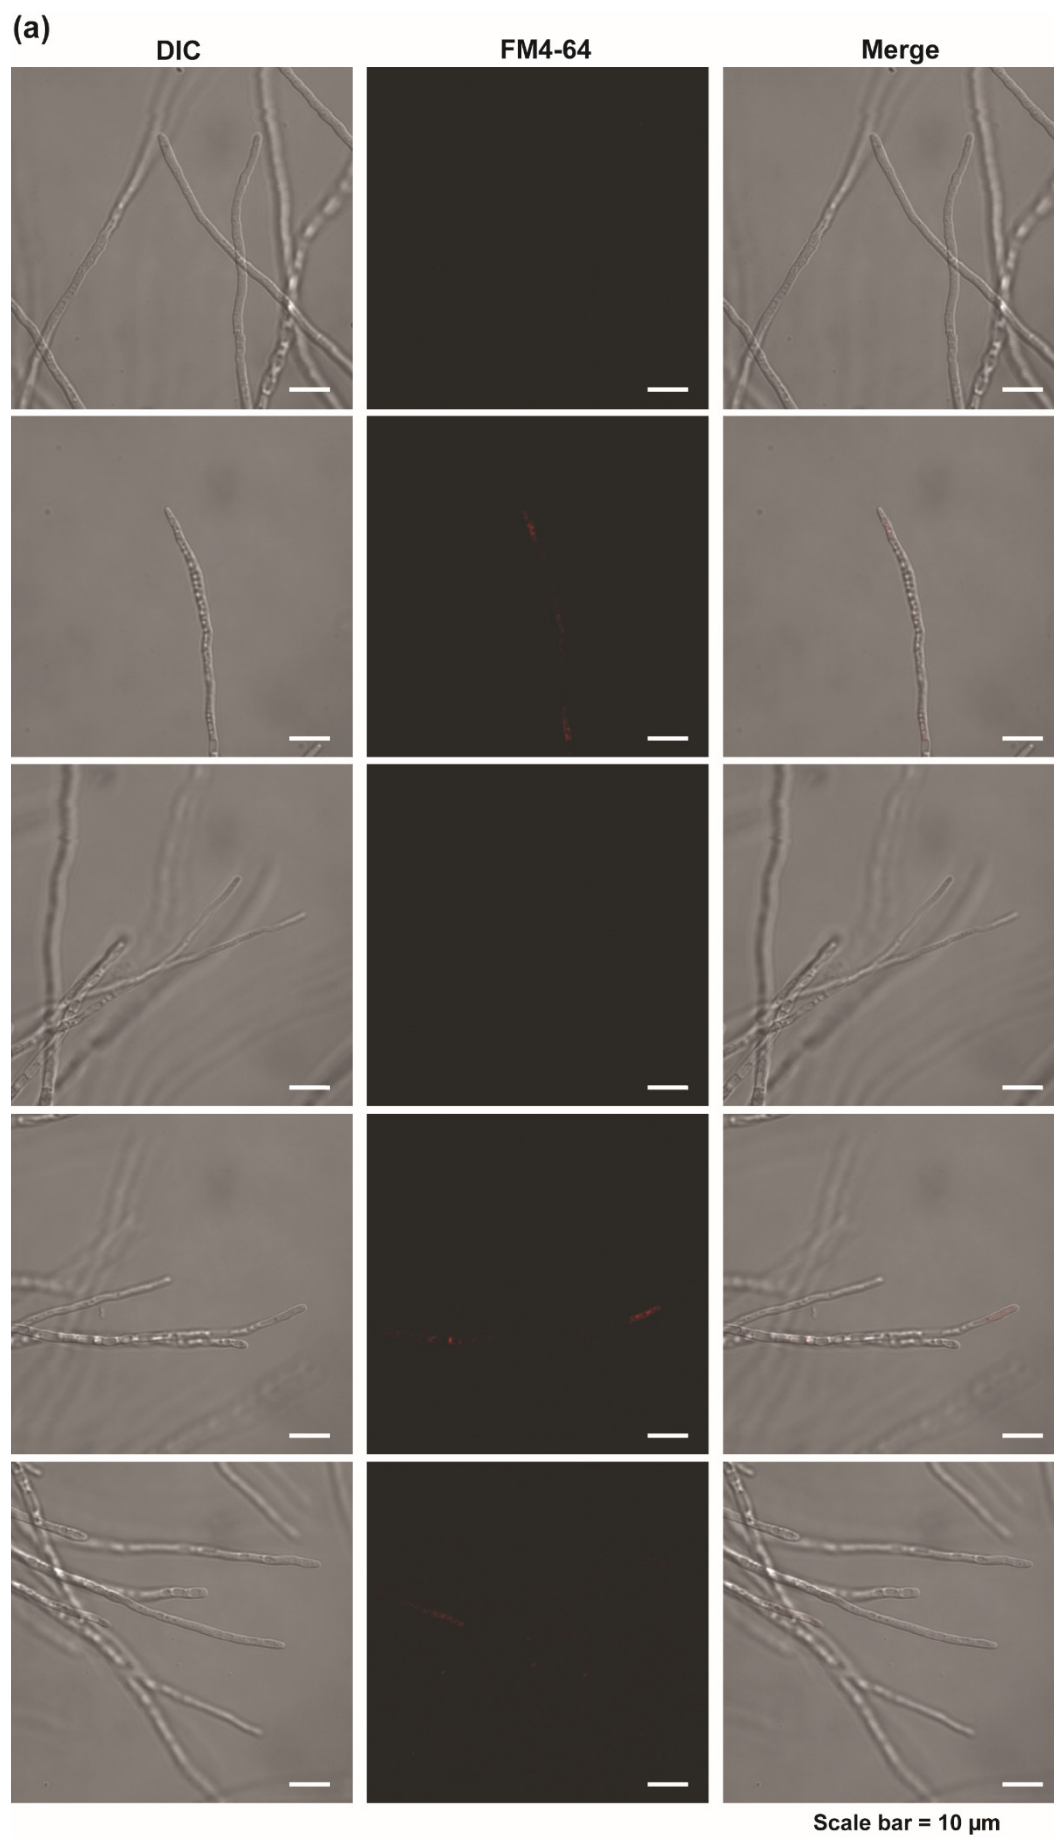

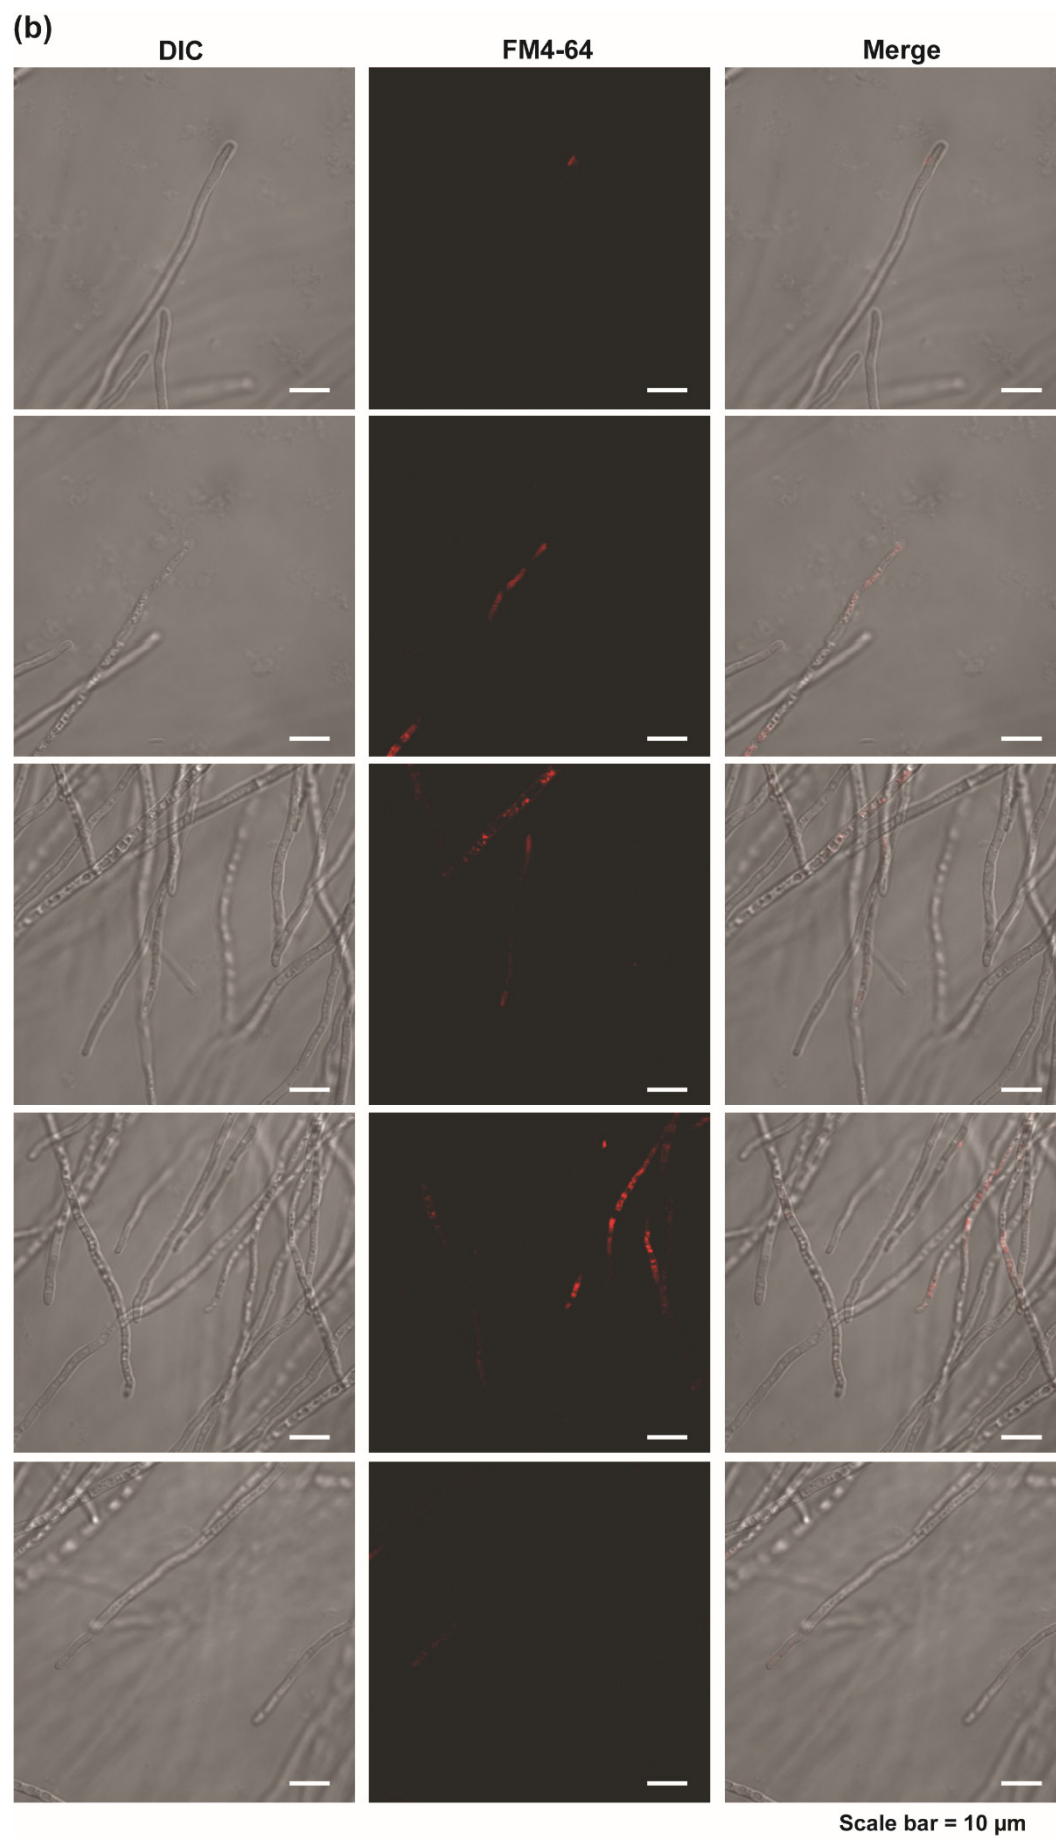

**Supplementary Figure S5.** Staining of vesicles in fungal hyphae using FM4-64. Fungal hyphae were stained at 16 h after spores were exposed to none (control) (a) and RF-EMF (2 GHz, 0.01 W) for 10 min (b).



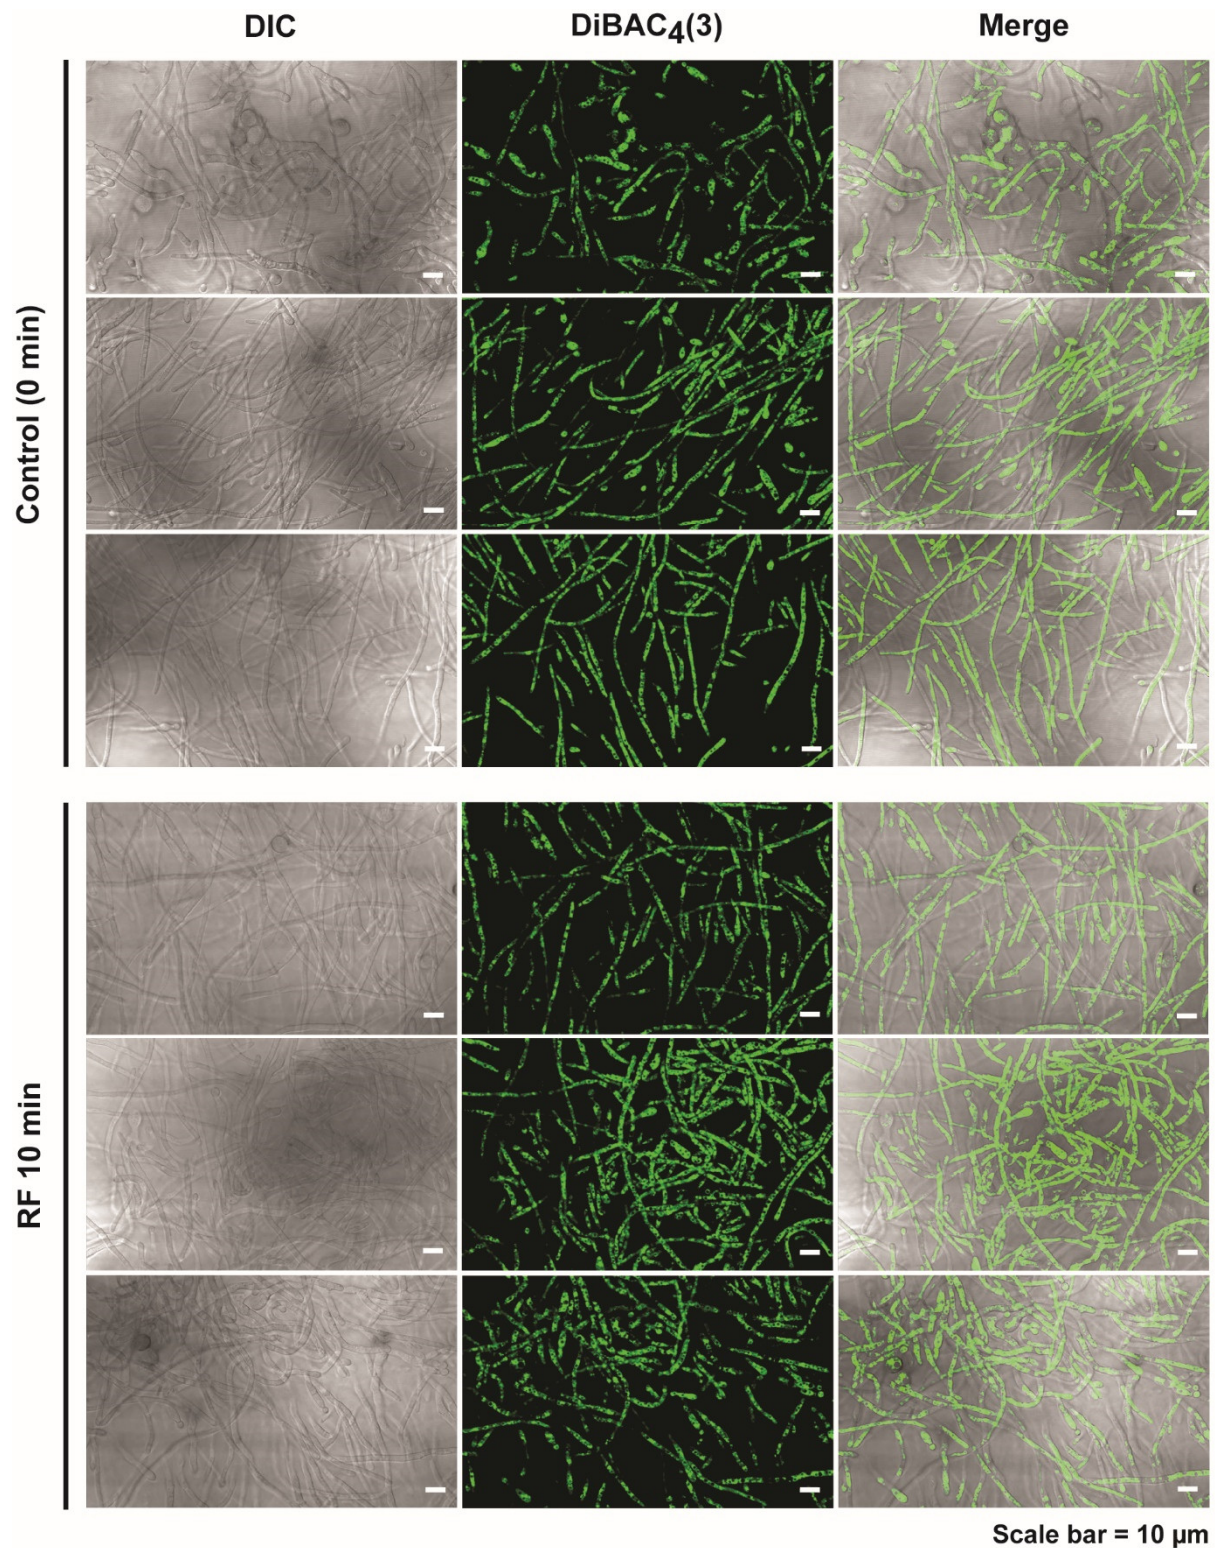

**Supplementary Figure S6.** Assay for membrane potential of fungal hyphae. A fluorescent indicator DiBAC<sub>4</sub>(3) was applied to fungal hyphae at 16 h after spores were exposed to none (control) and RF-EMF (2 GHz, 0.01 W) for 10 min.



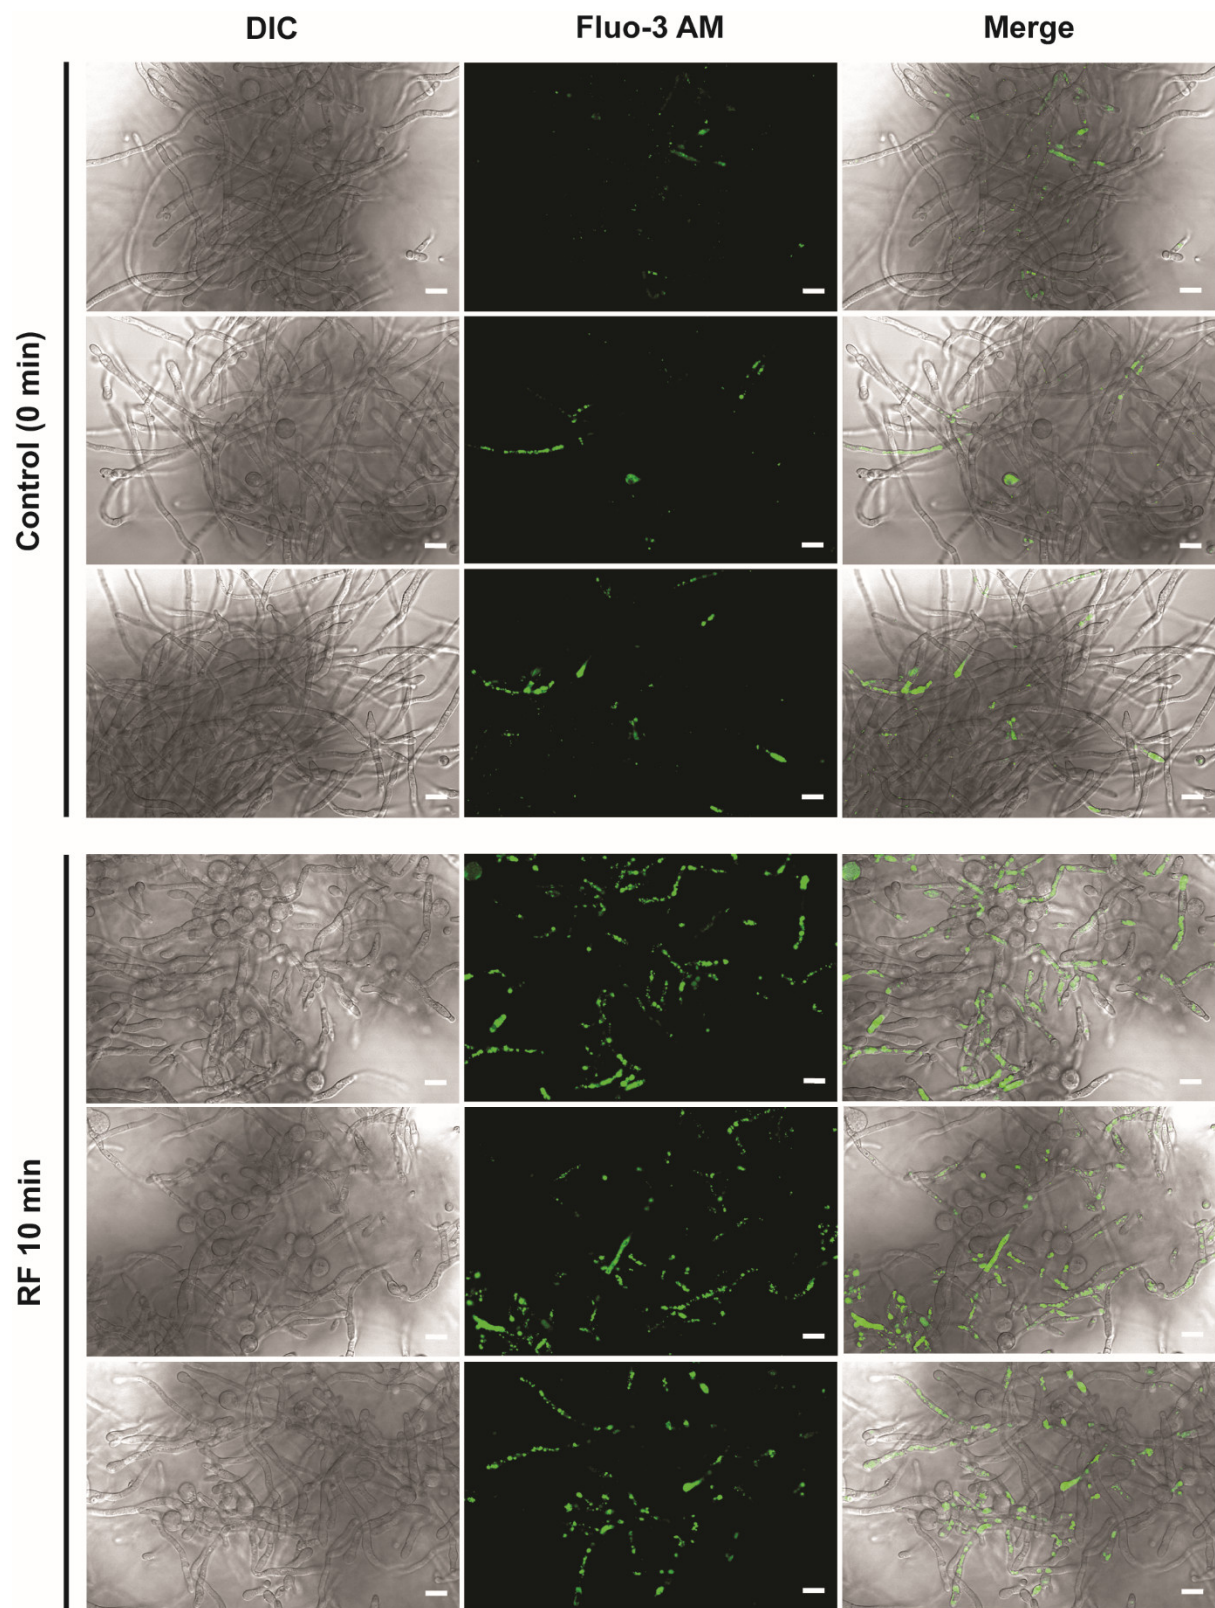

Scale bar = 10  $\mu$ m

**Supplementary Figure S7.** Staining intracellular  $\text{Ca}^{2+}$  in fungal hyphae. A fluorescent dye, Fluo-3 AM, was used for staining fungal hyphae at 16 h after spores were exposed to none (control) and RF-EMF (2 GHz, 0.01 W) for 10 min.

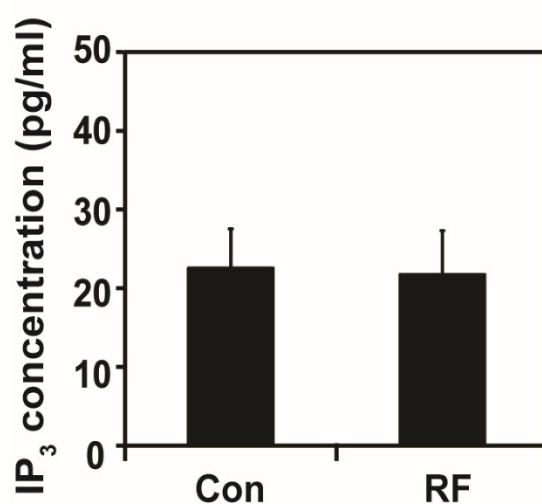

**Supplementary Figure S8.** Level of IP<sub>3</sub> in fungal hyphae. Fungal hyphae were harvested at 16 h after fungal spores were exposed to none (control) and RF-EMF (2 GHz, 0.01 W) for 10 min. Each value represents the mean of 9 (3 repeated experiment and 3 replicate measurements per each) or 12 (4 repeated experiment and 3 replicate measurements per each) replicate measurements.
